# Supplementary material
Source: PubMed Central journal article supplement (PMC4333476)
Supplement: IAI.02878-14_zii999091124so1.pdf [file IAI.02878-14_zii999091124so1.pdf]

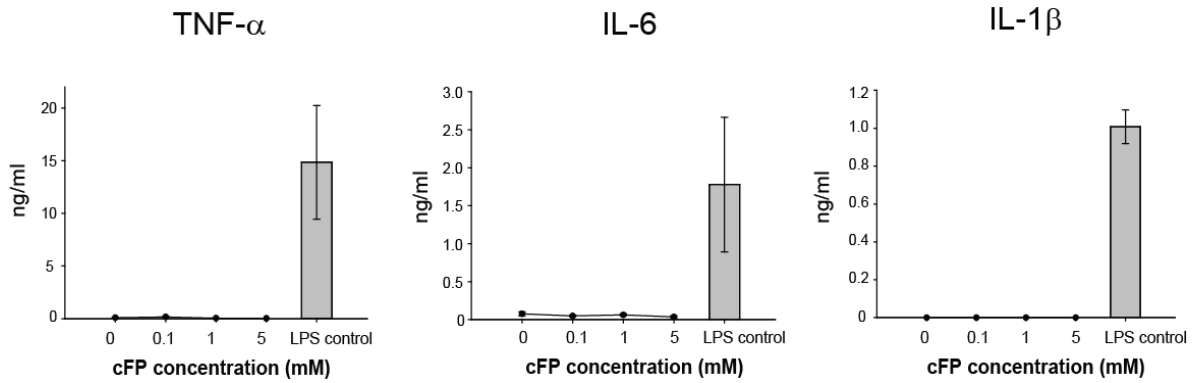

**Figure S1. cFP does not induce pro-inflammatory cytokine expression in mouse macrophages.**

(A) J774A.1 cells were treated with 100 ng/ml LPS or the indicated concentration of cFP for 24 h. The levels of TNF- $\alpha$  and IL-6 from the culture supernatants were measured by ELISA. Data represent mean  $\pm$  SD (n=3).

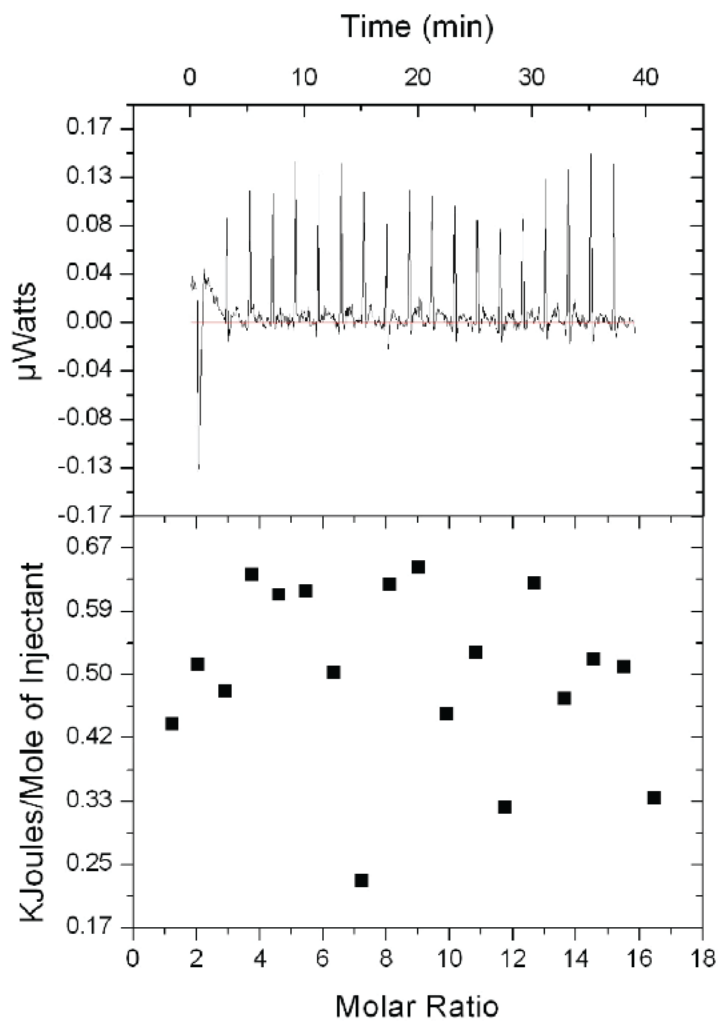

**Figure S2. cFP does not bind to LPS.**

Isothermal titration calorimetry was used to assess interactions between LPS and cFP. cFP (1 mM) was titrated into the solution of LPS (12  $\mu\text{M}$ ) at 37  $^{\circ}\text{C}$ , and the enthalpy change was monitored. Data are representative of three independent experiments with similar results

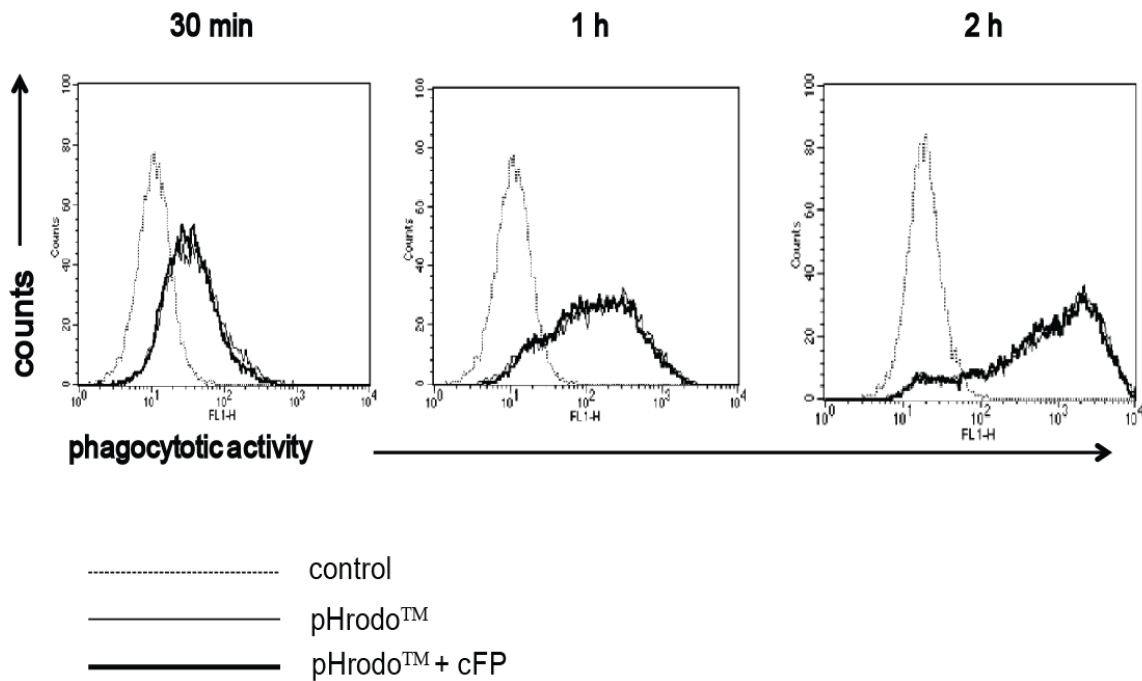

**Figure S3. cFP does not affect phagocytosis of macrophages.**

J774A.1 cells were treated with 100  $\mu$ l pHrodo™ Green *E. coli* BioParticles® Conjugate in the presence or absence of 4 mM cFP for the indicated time, and the phagocytosis activity was detected by flow cytometry.

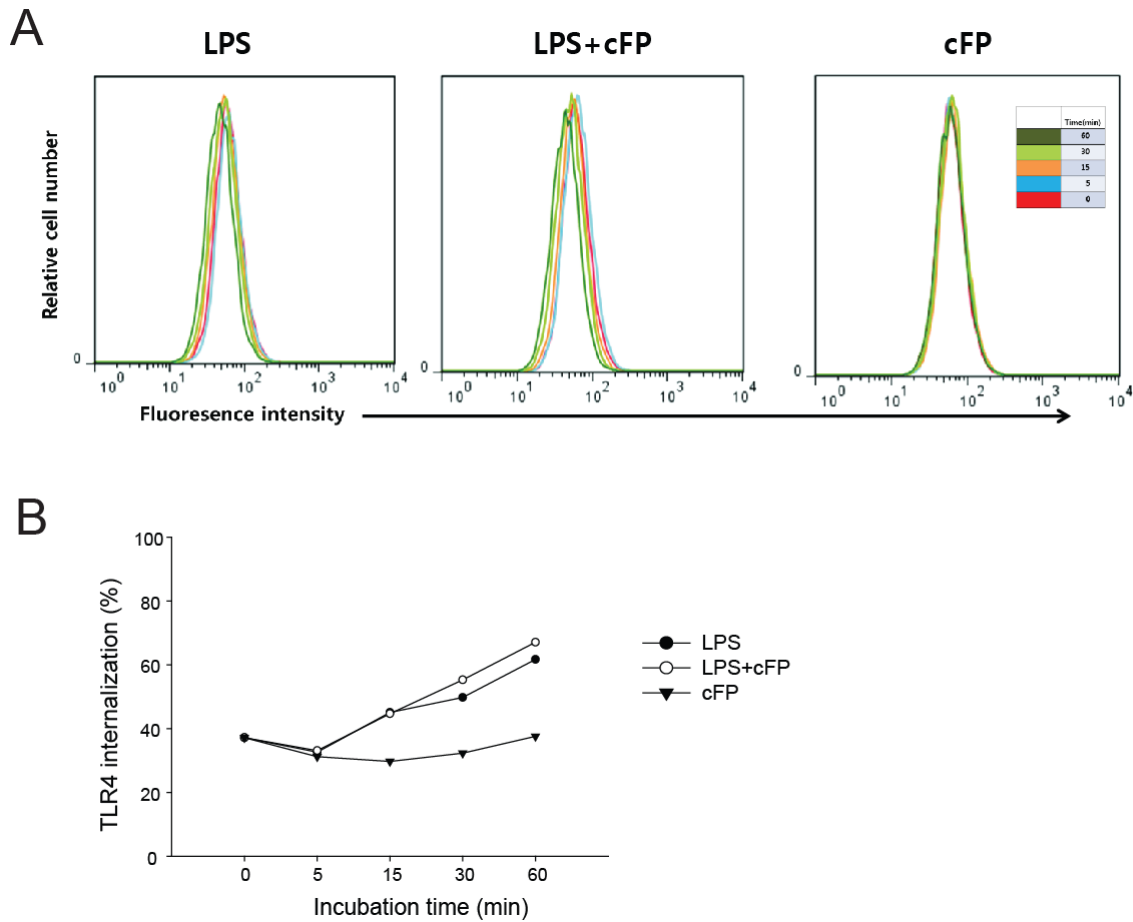

**Figure S4. cFP does not affect TLR4 internalization induced by LPS.**

(A) J774A.1 cells were treated with LPS in the presence or absence of 4 mM cFP for the indicated time. The TLR4 internalization ratio was measured using a TLR4-PE antibody by FACS analysis. Each experiment was performed in triplicate and repeated at least three times, which yielded similar results. (B) Plotting presentation of the data shown in (A).

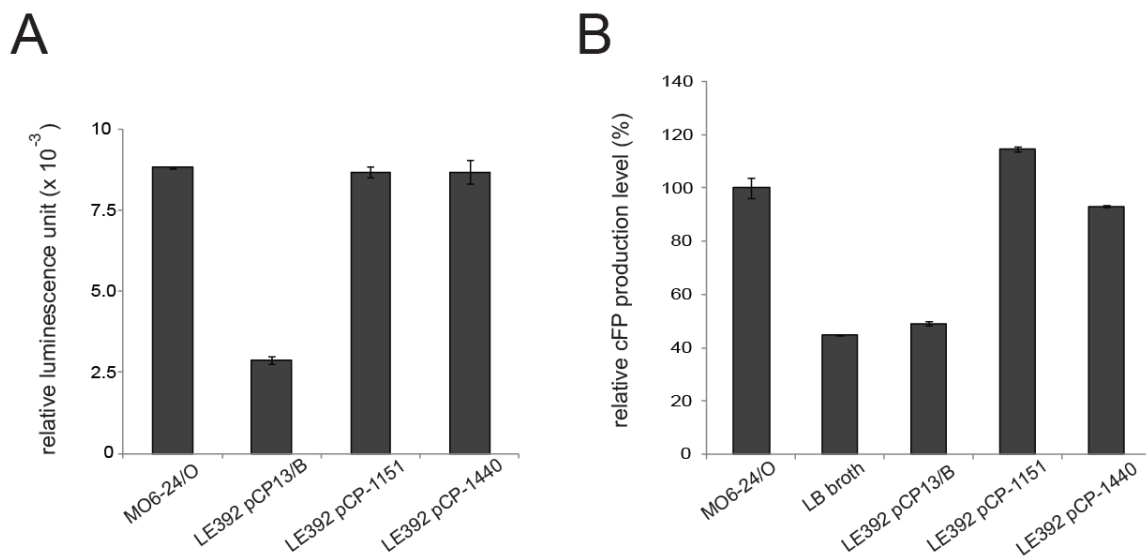

**Figure S5. The cFP production in wild-type *V. vulnificus*, LE392 pCP-13/B, LE392 pCP-1151, and pCP-1440.**

(A) Luciferase activity of wild-type *V. vulnificus* MO6-24/O, LE392 pCP-13/B, LE392 pCP-1151, and pCP-1440 was measured using the cFP bio-reporter MT102 pSB403 as described in the Materials and Methods. The relative luminescence units (RLU) represent the luminescence values normalized to cell density ( $OD_{600}$ ). (B) Relative cFP production levels of wild-type *V. vulnificus* MO6-24/O, LB broth, LE392 pCP-13/B, LE392 pCP-1151, and pCP-1440. cFP production was measured using HPLC as described in the Materials and Methods. The data are the average values of three independent experiments, and error bars denote SDs.

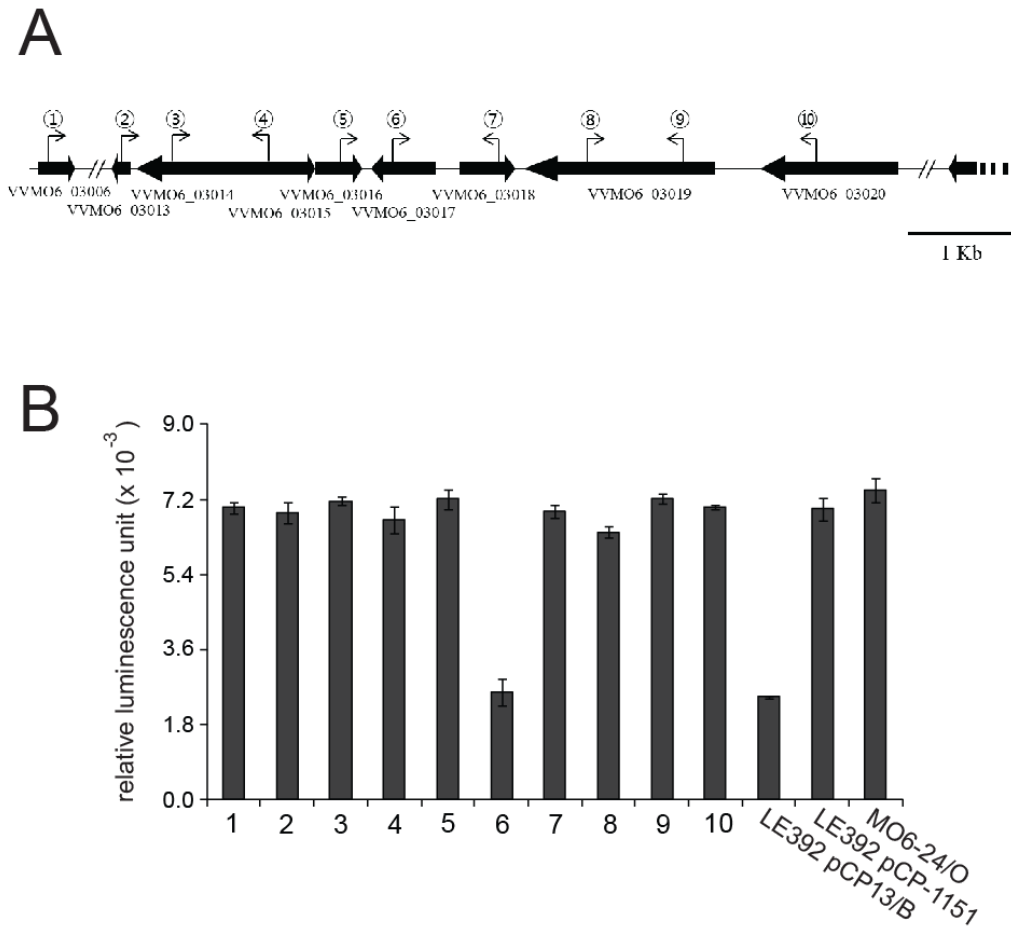

**Figure S6. A transposon insertion mutant of VVMO6-03017 decreased cFP production.**

(A) The list of genes in the pCP-1151 clone and the position of the transposon insertion. The directions of the transposons are marked with arrows. (B) The luminescence of each transposon insertion mutant was measured using the cFP bio-reporter MT102 pSB403 as described in the Methods. Numbers 1 to 10 represent mutants with transposon insertions indicated in the gene illustration shown in (A). The relative luminescence units (RLU) represent the luminescence values normalized to cell density ( $OD_{600}$ ). The data are the average values of three independent experiments, and error bars denote SDs.

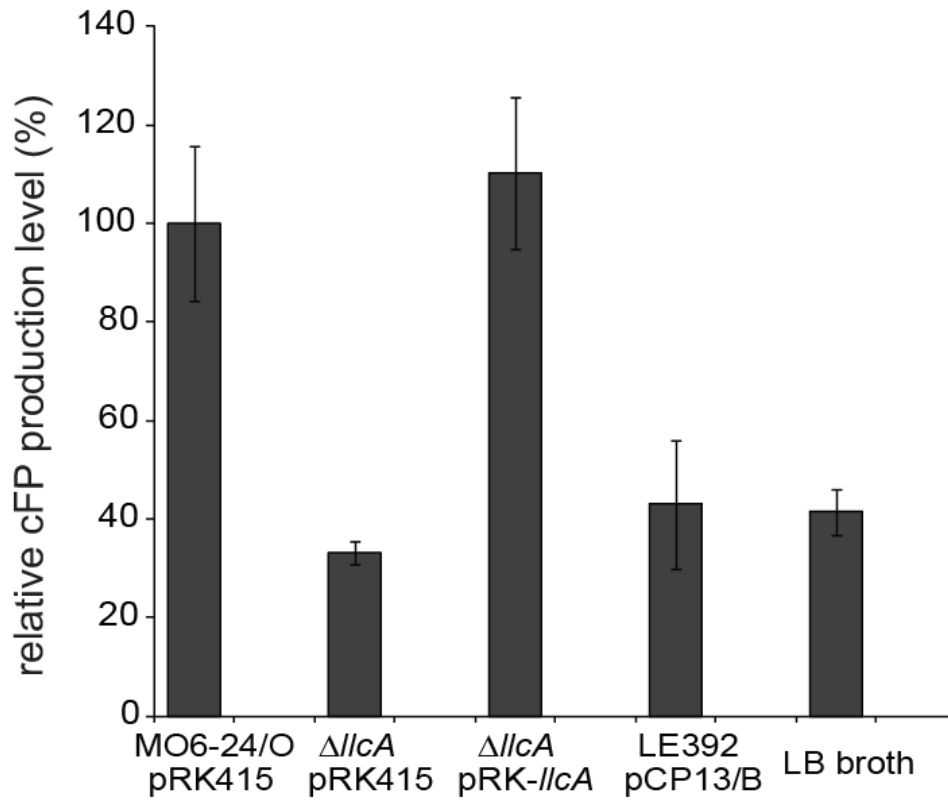

**Figure S7. The *llcA* gene was related to cFP production.**

Relative cFP production levels of *V. vulnificus* MO6-24/O (pRK415),  $\Delta llcA$  (pRK415), and the complementation strain  $\Delta llcA$  (pRK-*llcA*) were measured using HPLC as described in the Materials and Methods. The data are the average values of three independent experiments, and error bars denote SDs.

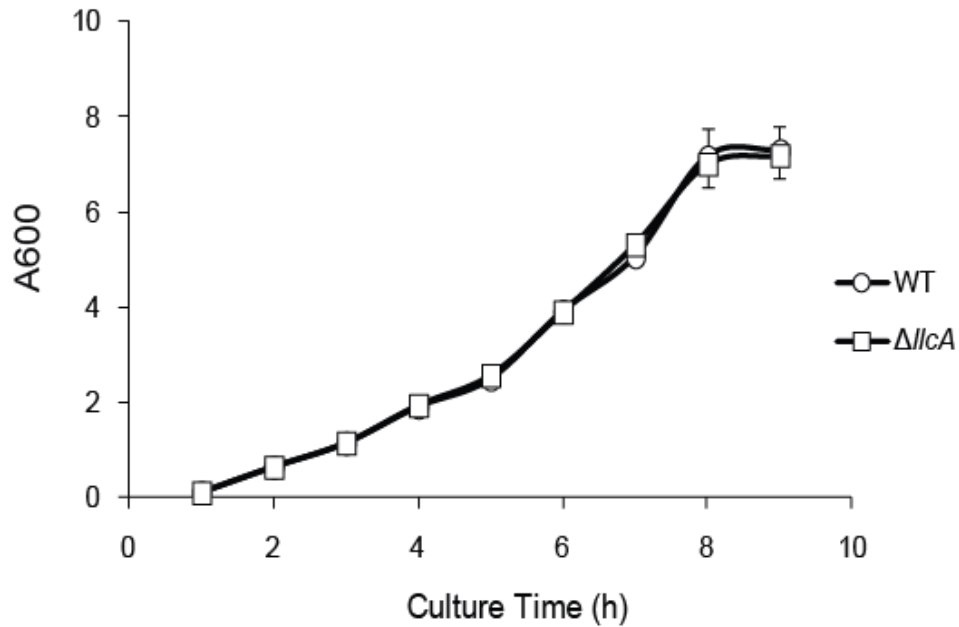

**Figure S8.  $\Delta lfcA$  mutant has no defect in growth rate.**

Overnight cultures of wild type (MO6-24/O) and  $\Delta lfcA$  mutant grown in LB were washed and diluted to the A<sub>600</sub> (absorbance at 600 nm) value of 0.1 into fresh LB medium. Bacteria were grown at 30 °C for indicated times, and A<sub>600</sub> was measured.



**Table S1. Bacterial strains and plasmids used in this study**

| Strains or plasmids        | Genotypes                                                                                                                                                                   | Sources        |
|----------------------------|-----------------------------------------------------------------------------------------------------------------------------------------------------------------------------|----------------|
| <b>Strains</b>             |                                                                                                                                                                             |                |
| <i>E. coli</i>             |                                                                                                                                                                             |                |
| DH5 $\alpha$               | $\lambda^-$ $\phi$ 80 <i>dlacZ</i> $\Delta$ M15 $\Delta$ ( <i>lacZYA-argF</i> )U169<br><i>recA1 endA1 hsdR17</i> ( $r_K^- m_K^-$ ) <i>supE44 thi-1</i><br><i>gyrA relA1</i> | Our collection |
| LE392                      | <i>glnV44 supF58</i> ( <i>lacY1</i> or $\Delta$ <i>lacZY</i> ) <i>glaK2</i><br><i>metB1 trpR55 hsdR514</i> ( $r_K^- m_K^+$ )                                                | Promega        |
| S17-1                      | [C600:: <i>RP4-2</i> ( <i>Tc</i> :: <i>Mu</i> )( <i>Km</i> :: <i>Tn7</i> ) <i>thi pro</i><br><i>hsdRM<sup>+</sup> recA</i> , <i>Tp<sup>r</sup></i>                          | [1]            |
| S17-1 $\lambda$ <i>pir</i> | S17-1 with $\lambda$ <i>pir</i> lysogen                                                                                                                                     | [1]            |
| <i>V. vulnificus</i>       |                                                                                                                                                                             |                |
| MO6-24/O                   | Pathogenic clinical isolate                                                                                                                                                 | [2]            |
| $\Delta$ <i>llcA</i>       | Derivative of MO6-24/O with a deletion in<br><i>llcA</i>                                                                                                                    | This study     |
| <b>Plasmids</b>            |                                                                                                                                                                             |                |
| pCP13/B                    | Broad host range cosmid vector, <i>Tc<sup>r</sup></i>                                                                                                                       | [3]            |
| pCP-1151                   | pCP 13/B vector containing the partial<br>genome of <i>V. vulnificus</i>                                                                                                    | This study     |
| pGEM-T Easy                | TA-cloning vector, <i>lacZ</i> , <i>f1</i> origin, <i>Ap<sup>r</sup></i>                                                                                                    | Promega        |
| pGEM- <i>llcKO</i>         | pGEM-T Easy vector containing the<br>deletion in <i>llcA</i>                                                                                                                | This study     |
| pRK415                     | <i>IncP ori</i> , broad-host-range vector; <i>oriT</i> of<br>RP4, <i>Tc<sup>r</sup></i>                                                                                     | [4]            |
| pRK- <i>llcA</i>           | pRK415 with <i>V. vulnificus llcA</i>                                                                                                                                       | This study     |
| pDM4                       | Suicide vector for allelic exchange, <i>sacB</i> ,<br><i>Cm<sup>r</sup></i>                                                                                                 | [5]            |
| pDM4- <i>llcKO</i>         | pDM4 with a <i>V. vulnificus llc</i> deletion                                                                                                                               | This study     |

\* Numbers indicate nucleotide positions relative to the translational start site

Abbreviations: *Tp*, trimethoprim; *Tc*, tetracycline; *Ap*, ampicillin; *Cm*, chloramphenicol

### Source references

1. Simon R, Priefer, U., Pühler, A. (1983) A broad host range mobilization system for in vivo genetic

- engineering: transposon mutagenesis in gram negative bacteria. *Nature Biotechnology* 1: 784-791.
2. Reddy GP, Hayat U, Abeygunawardana C, Fox C, Wright AC, et al. (1992) Purification and determination of the structure of capsular polysaccharide of *Vibrio vulnificus* M06-24. *Journal of bacteriology* 174: 2620-2630.
  3. Darzins A, Chakrabarty AM (1984) Cloning of genes controlling alginate biosynthesis from a mucoid cystic fibrosis isolate of *Pseudomonas aeruginosa*. *Journal of bacteriology* 159: 9-18.
  4. Keen NT, Tamaki S, Kobayashi D, Trollinger D (1988) Improved broad-host-range plasmids for DNA cloning in gram-negative bacteria. *Gene* 70: 191-197.
  5. Milton DL, O'Toole R, Horstedt P, Wolf-Watz H (1996) Flagellin A is essential for the virulence of *Vibrio anguillarum*. *Journal of bacteriology* 178: 1310-1319.

**Table S2. Primers used for real time-PCR**

---

| <b>Genes</b>  | <b>Sequences (5'→3')</b>     |                            |
|---------------|------------------------------|----------------------------|
| <i>Il6</i>    | F: TAGTCCTTCCTACCCCAATTTCC   | R: TTGGTCCTTAGCCACTCCTTC   |
| <i>Tnfa</i>   | F: CCCTCACACTCAGATCATCTTCT   | R: GCTACGACGTGGGCTACAG     |
| <i>Inos</i>   | F: GTTCTCAGCCCAACAATAACAAGA  | R: GTGGACGGGTCGATGTCAC     |
| <i>Rantes</i> | F: GCTGCTTTGCCTACCTCTCC      | R: TCGAGTGACAAACACGACTGC   |
| <i>Ip10</i>   | F: CCAAGTGCTGCCGTCATTTTC     | R: GGCTCGCAGGGATGATTTCAA   |
| <i>Mcp1</i>   | F: TTAAAAACCTGGATCGGAACCAA   | R: GCATTAGCTTCAGATTTACGGGT |
| <i>Hprt</i>   | F: GTTGGATACAGGCCAGACTTTGTTG | R: GAGGGTAGGCTGGCCTATAGGCT |

---

F: Forward direction, R: Reverse direction

**Table S3. Primers used for cloning and construction of *llc* mutant**

| <b>Purpose/ Name</b>                                         | <b>Nucleotide sequence (5' to 3')<sup>a</sup></b>   |
|--------------------------------------------------------------|-----------------------------------------------------|
| <b>Construction of a <i>llc</i> in-frame deletion mutant</b> |                                                     |
| llcKO_F1                                                     | GTTACGCAACTTTTCATCTA                                |
| llcKO_B1                                                     | GAAC <u>CTTGGGG</u> CGGTAGCAACA                     |
| llcKO_F2                                                     | GAGAA <u>CCAAGG</u> CACTGCCT                        |
| llcKO_B2                                                     | CTTCGGCCCCAACCCCTTGCA                               |
| <b>Cloning of <i>llc</i></b>                                 |                                                     |
| llc_comF                                                     | GACGGCCAGT <u>GAATTC</u> TGCGTTTTATGGTTTTTCTC       |
| llc_comB                                                     | GCTTGCATGC <u>CTGCAGT</u> GATTAAATAGCTCGTGTTCTGGTGT |

<sup>a</sup> Nucleotides modified for the generation of restriction sites are underlined.
